# Supplementary material for: Flexible and stable copper-based halide scintillator for high-performance X-ray imaging
Source: Royal Society of Chemistry journal article supplement (doi:10.1039/d2cc05429a), 2022-01-01
Supplement: d2cc05429a1.pdf [file d2cc05429a1.pdf]

## Electronic Supporting Information

# Flexible and Stable Copper-Based Halide Scintillators for High-Performance X-Ray Imaging

*Baiqian Wang,<sup>†a</sup> Zhenglin Jia,<sup>†b</sup> Xin Yang,<sup>†a</sup> Shirong Lu,<sup>c</sup> Jinrong Zhao,<sup>a</sup> Zhe Sun,<sup>a</sup>  
Qingkai Qian,<sup>a,\*</sup> Qianqian Lin<sup>b,\*</sup> and Zhigang Zang<sup>a,\*</sup>*

<sup>a</sup>Key Laboratory of Optoelectronic Technology & Systems (Ministry of Education),  
Chongqing University, Chongqing, 400044, China

<sup>b</sup>School of Physics and Technology, Wuhan University, Wuhan, 430072, China

<sup>c</sup>Department of Material Science and Technology, Taizhou University, Taizhou, 318000,  
China

E-mail: [qqian@cqu.edu.cn](mailto:qqian@cqu.edu.cn), [q.lin@whu.edu.cn](mailto:q.lin@whu.edu.cn), [zangzg@cqu.edu.cn](mailto:zangzg@cqu.edu.cn)

## METHODS

**Chemical Preparations.** Copper bromide (CuBr, 99.9%), rubidium carbonate ( $\text{Rb}_2\text{CO}_3$ , 99.9%), and n-hexane (97%) were purchased from Macklin Co., Ltd. 1-Octadecene (>90%), oleylamine (>90%), oleic acid (97%), and toluene (99.5%) were purchased from Aladdin Co. Ltd. Polymethyl methacrylate (PMMA, >98%) was purchased from Tokyo Co. Ltd.

**Synthesis of  $\text{Rb}_2\text{CuBr}_3$  NCs.**  $\text{Rb}_2\text{CuBr}_3$  NCs were synthesized using a hot-injection method, in which raw materials of CuBr (0.172 g) are dissolved in solution 1-octadecene (20 ml) together with oleylamine (2 ml) and oleic acid (2 ml). Then, the above mixture was heated to 170 °C at  $\text{N}_2$  atmosphere. Finally, the nucleation and growth of  $\text{Rb}_2\text{CuBr}_3$  NCs was triggered by the rapid injection of Rb-oleate (4 ml). After 10 s, the above raw mixture was quenched to room temperature, and the  $\text{Rb}_2\text{CuBr}_3$  NCs were purified by centrifugation (8000 rpm for 5 min) with n-hexane. The above Rb-oleate was obtained by dissolving  $\text{Rb}_2\text{CO}_3$  (0.231 g) in 1-octadecene (5 ml) and oleic acid (1.5 ml), with 140 °C at  $\text{N}_2$  atmosphere.

**Synthesis of polymer films.** PMMA (1200 mg) powders were added into toluene (8 ml) and stirred at 50 °C for 1 hour. Then, the PMMA colloids were added into the as-synthesized  $\text{Rb}_2\text{CuBr}_3$  NCs and stirred at atmospheric environment for one more hour. The above mixture of  $\text{Rb}_2\text{CuBr}_3$  NCs@PMMA colloid was removed into the prefabricated template and heated in air. The flexible film of  $\text{CsPbBr}_3$ @PMMA can be peeled off. The thickness of the films was controlled by the mixture amount added to the template.

**DFT calculations.** DFT calculations are conducted using Vienna ab initio simulation package (VASP). Density functional of Perdew-Burke-Ernzerhof (PBE) with generalized gradient approximation (GGA) was used. Projector augmented wave (PAW) pseudopotential was adopted. The kinetic cutoff energy was set to be 400 eV. The electronic wavefunction was self-consistently converged to  $10^{-5}$  eV. During the lattice relaxation, Gamma-center k-point mesh grids of  $6 \times 2 \times 2$  and atomic force criteria of 0.005 eV/Å were used. To further correct the

bandgap, hybrid functional of HSE06 was used, and the band structure and DOS were interpolated by the maximally localized Wannier functions (MLWFs) through Wannier90 codes. To simulate the self-trapped exciton effect, one spin-down electron in the collinear spin-polarized calculation was excited to the lowest unoccupied spin-up or spin-down conduction band, and then the atomic structure was relaxed again while maintaining the band occupations.

**Characterizations.** XRD measurements were conducted using a Cu K $\alpha$  X-ray tube (40 kV, 40 mA) by PANalytical X'Pert Powder (Spectris Pte. Ltd., Netherlands). XPS spectra were performed by ESCALAB250Xi (Thermo Fisher Scientific Co., Ltd., USA). TEM measurements were measured by Talos F200S (Thermo Fisher Scientific Co., Ltd., USA). Both PLE and PL characterizations were performed in air environment. The steady and transient PL of Rb<sub>2</sub>CuBr<sub>3</sub> NCs were measured using fluorescence spectrometer (FLS1000, Edinburgh Instruments Ltd., England). The total X-ray attenuation rate of the Rb<sub>2</sub>CuBr<sub>3</sub> can be obtained from the XCOM: Photon Cross Sections Database (NIST Standard Reference Database 8, 2013). For the RL and X-ray imaging measurements, a commercial X-ray source L10321 (Hamamatsu Co., Ltd., Japan) was used. The RL spectra and X-ray detection limit were recorded by NOVA-EX fiber optic spectrometer (Shanghai Ideaoptics Co., Ltd., China) and SM1PD2A photodetector (Changchun ocean electro-optics Co., Ltd., China). The X-ray scintillation image was captured by Charge-coupled device (CCD, KAF-16803, USA).

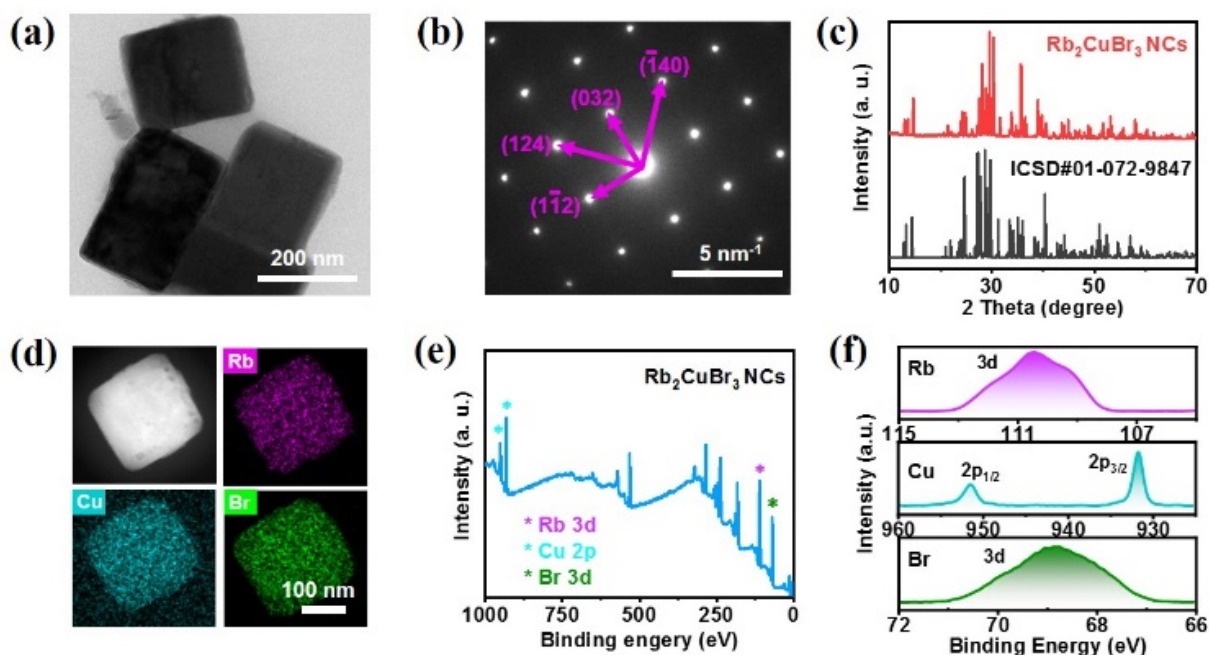

**Figure S1.** (a) Transmission electron microscope (TEM) image, (b) electron diffraction pattern and (c) X-ray diffraction (XRD) patterns of  $\text{Rb}_2\text{CuBr}_3$  NCs. (d) Energy dispersive X-ray (EDX) mapping of Rb, Cu, and Br elements. (e) Survey spectrum of X-ray photoelectron spectroscopy (XPS) and (f) the enlarged spectra of Rb, Cu, and Br. Especially, the XPS peak of Cu  $2p_{3/2}$  is located at 932.5 eV and fitted well with a Gaussian function, indicating the univalent Cu with the absence of  $\text{Cu}^{2+}$ .

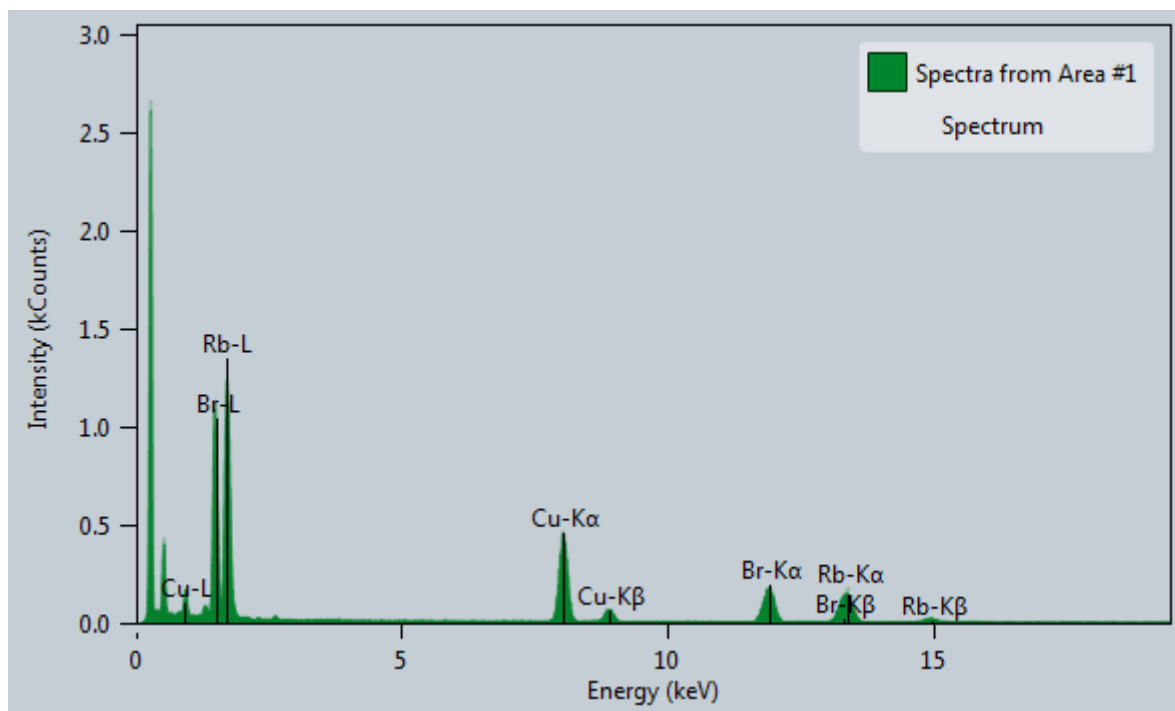

**Figure S2.** Energy-dispersive X-ray spectroscopy of  $\text{Rb}_2\text{CuBr}_3$  NCs.

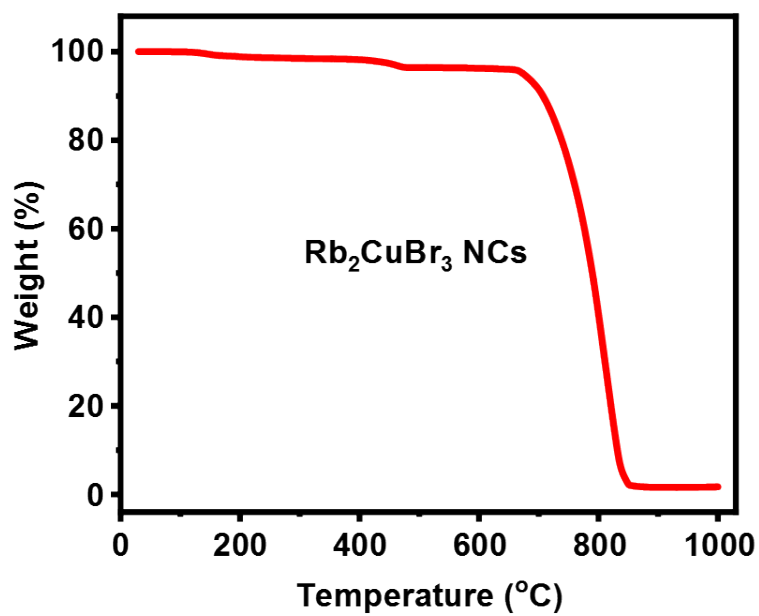

**Figure S3.** Thermogravimetric curve of  $\text{Rb}_2\text{CuBr}_3$  NCs.

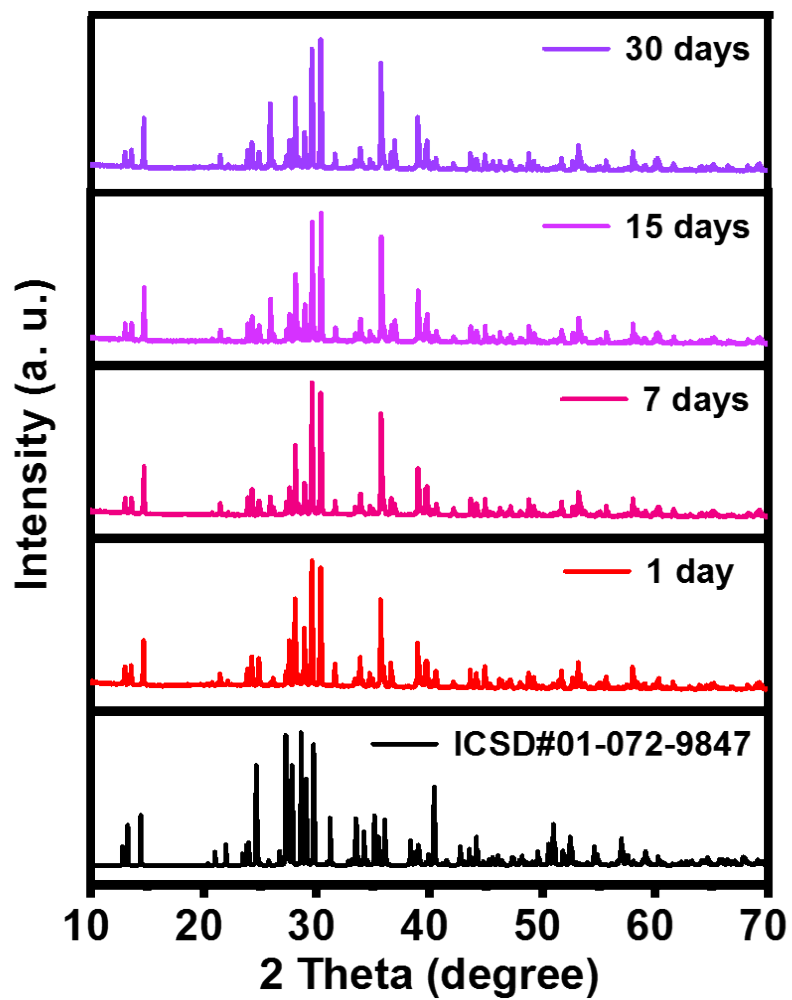

**Figure S4.** XRD patterns of Rb<sub>2</sub>CuBr<sub>3</sub> NCs stored in air for different time.

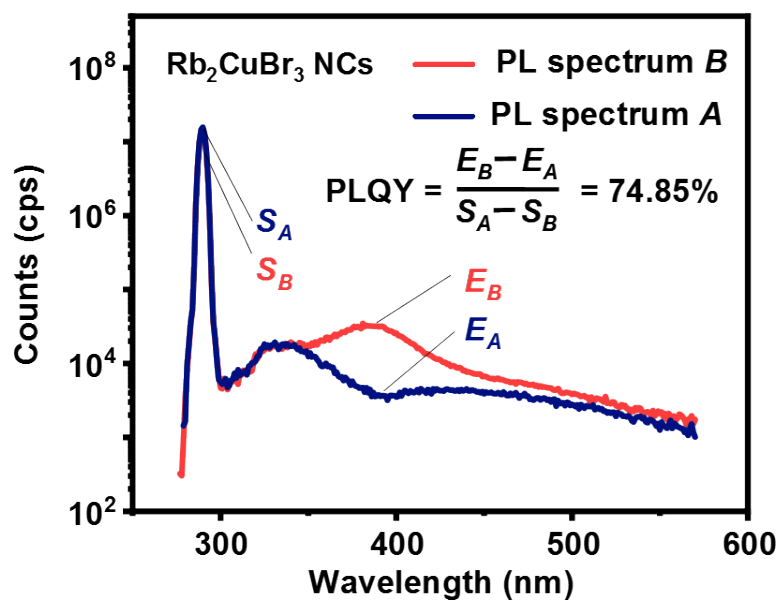

**Figure S5.** PLQY of Rb<sub>2</sub>CuBr<sub>3</sub> NCs. PL spectrum A and B are for blank sample and Rb<sub>2</sub>CuBr<sub>3</sub> NCs respectively, measured in an integrated sphere.  $S_A$  and  $S_B$  are intensities for photons at excitation wavelength, while  $E_A$  and  $E_B$  are intensities for photons of PL emission.

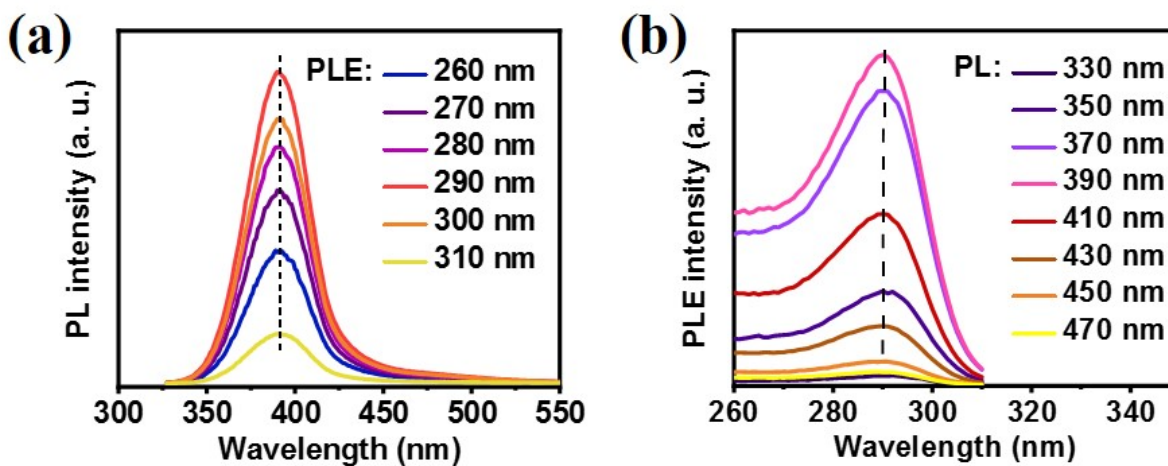

**Figure S6.** (a) PL spectra under different wavelength excitations. (b) Emission-wavelength dependent PL excitation (PLE) spectra of Rb<sub>2</sub>CuBr<sub>3</sub> NCs.

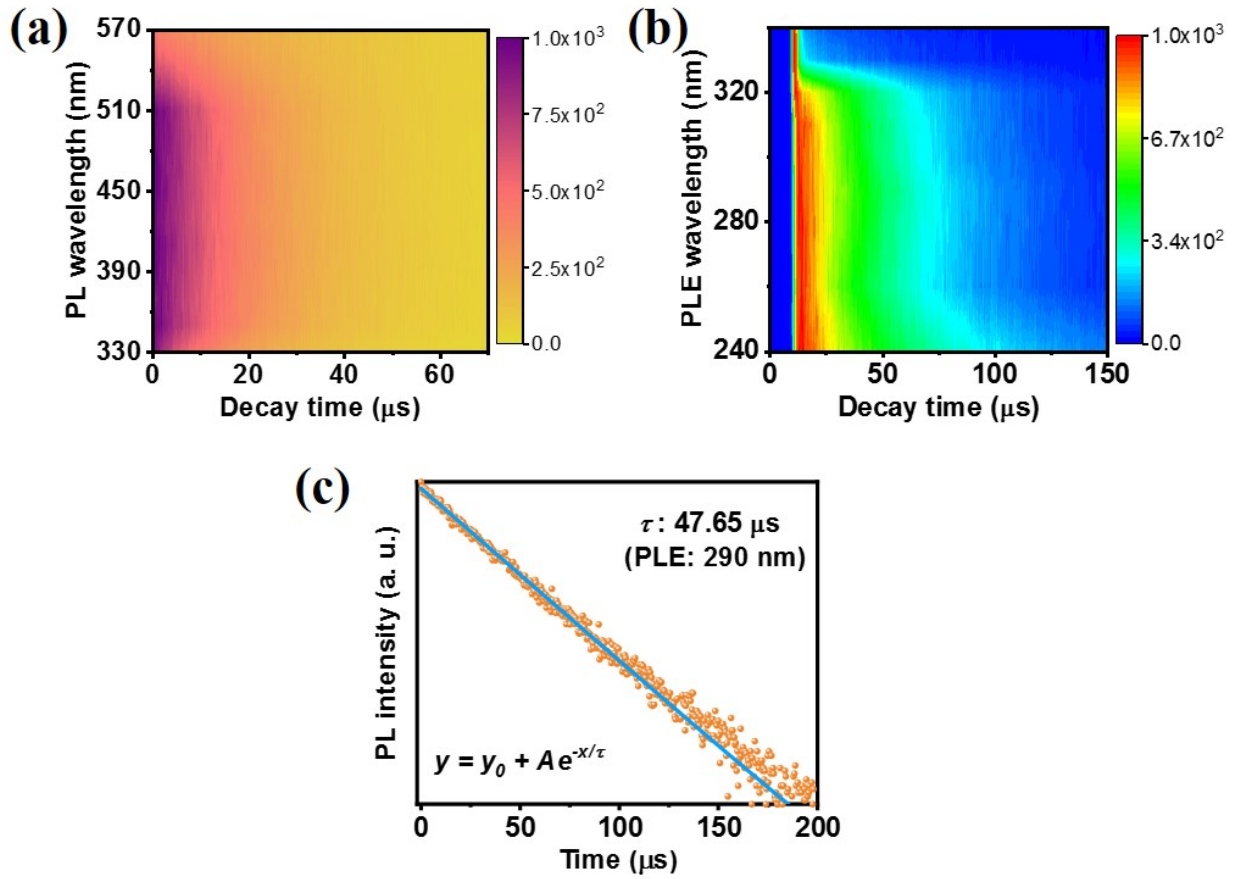

**Figure S7.** (a) Transient PL mapping after 290 nm pulse excitation. (b) The emission-wavelength dependent PLE spectra of  $\text{Rb}_2\text{CuBr}_3$  NCs with different decay time (Monitored PL peak at 390 nm). (c) Time-resolved PL decay curve and fitting lifetime of  $\text{Rb}_2\text{CuBr}_3$  NCs.

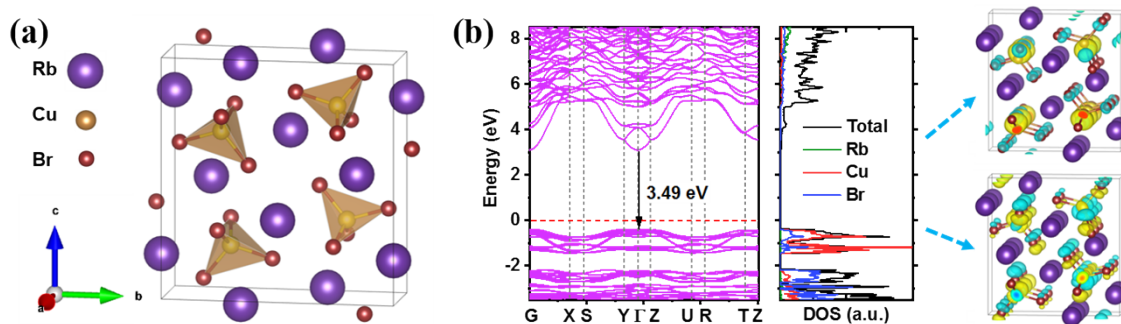

**Figure S8.** (a) Crystal structure of  $\text{Rb}_2\text{CuBr}_3$  and (b) the corresponding electronic band diagram, density of states (DOS), and electron wavefunctions at conduction band minimum (CBM) and valence band maximum (VBM).

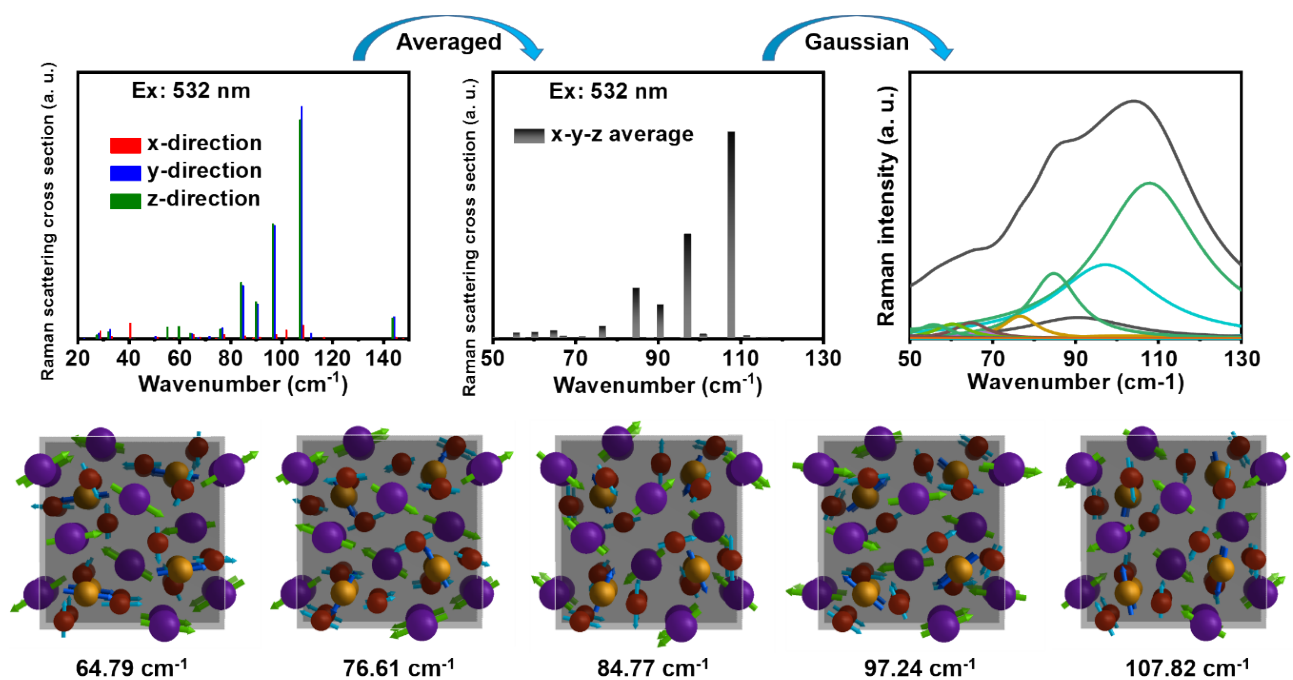

**Figure S9.** Calculated Raman spectra and typical phonon modes of  $\text{Rb}_2\text{CuBr}_3$ .

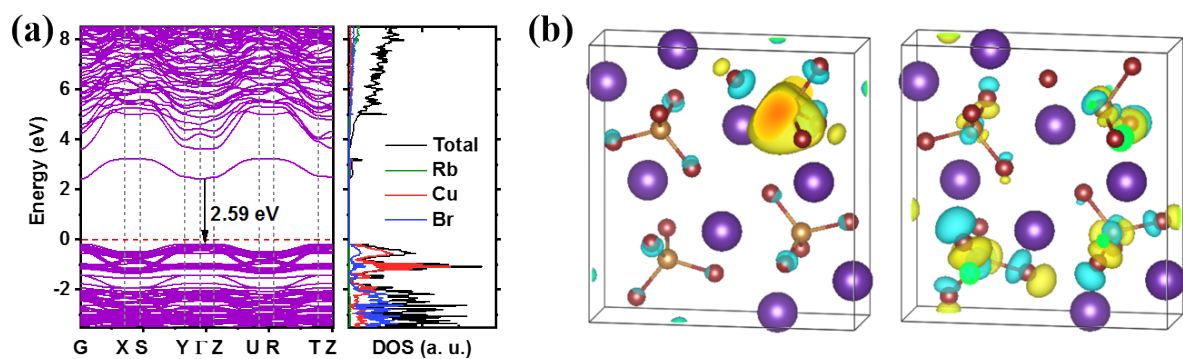

**Figure S10.** (a) The electronic band diagram, and (b) the electron wavefunctions at CBM and VBM after the formation of STE.

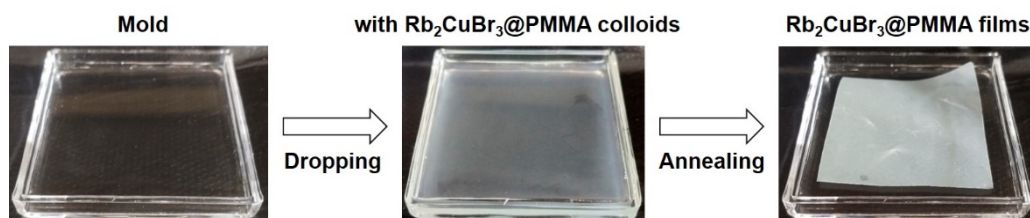

**Figure S11.** Fabrication process of  $\text{Rb}_2\text{CuBr}_3$ @PMMA composite film.  $\text{Rb}_2\text{CuBr}_3$  NCs were mixed with PMMA colloids in a glass mold, subsequently followed by the degassing and curing processes at room temperature and in air for 2 h.

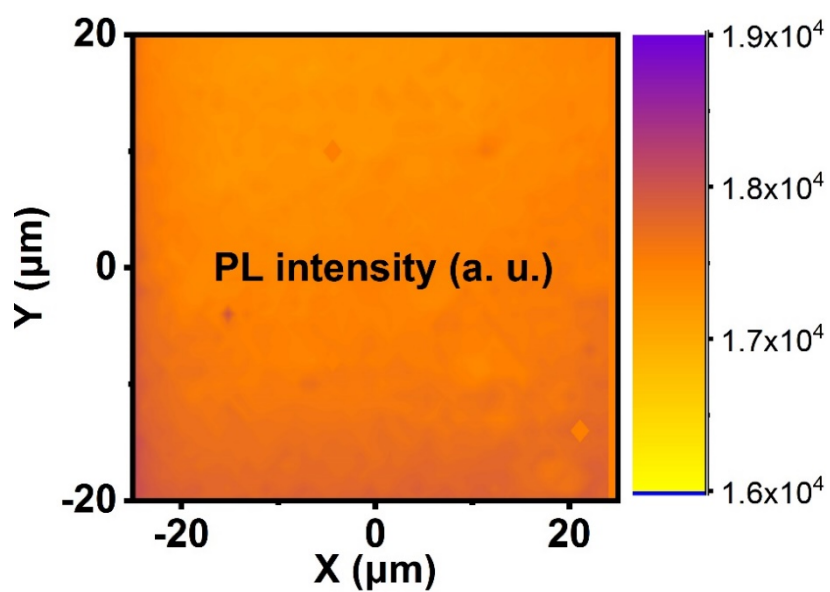

**Figure S12.** PL mapping of  $\text{Rb}_2\text{CuBr}_3@\text{PMMA}$  composite film.

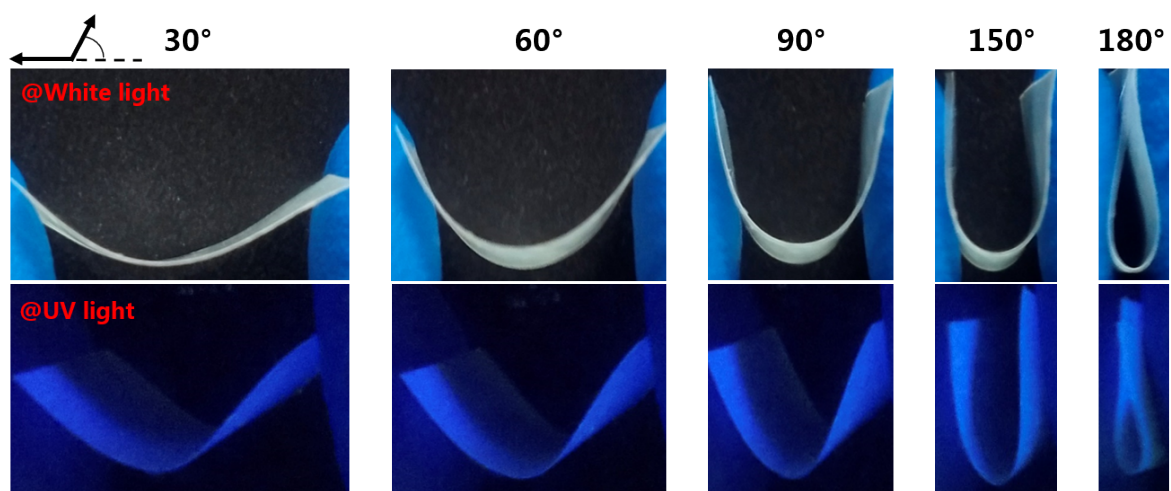

**Figure S13.** Flexible  $\text{Rb}_2\text{CuBr}_3@\text{PMMA}$  films under white light and UV light illuminations.

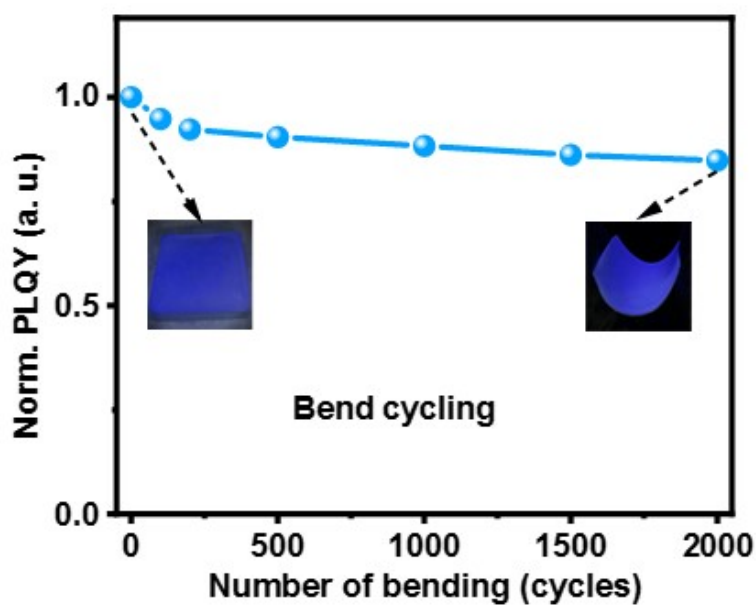

**Figure S14.** Normalized photoluminescence quantum yields (PLQYs) of  $\text{Rb}_2\text{CuBr}_3@\text{PMMA}$  films with increasing bending cycles.

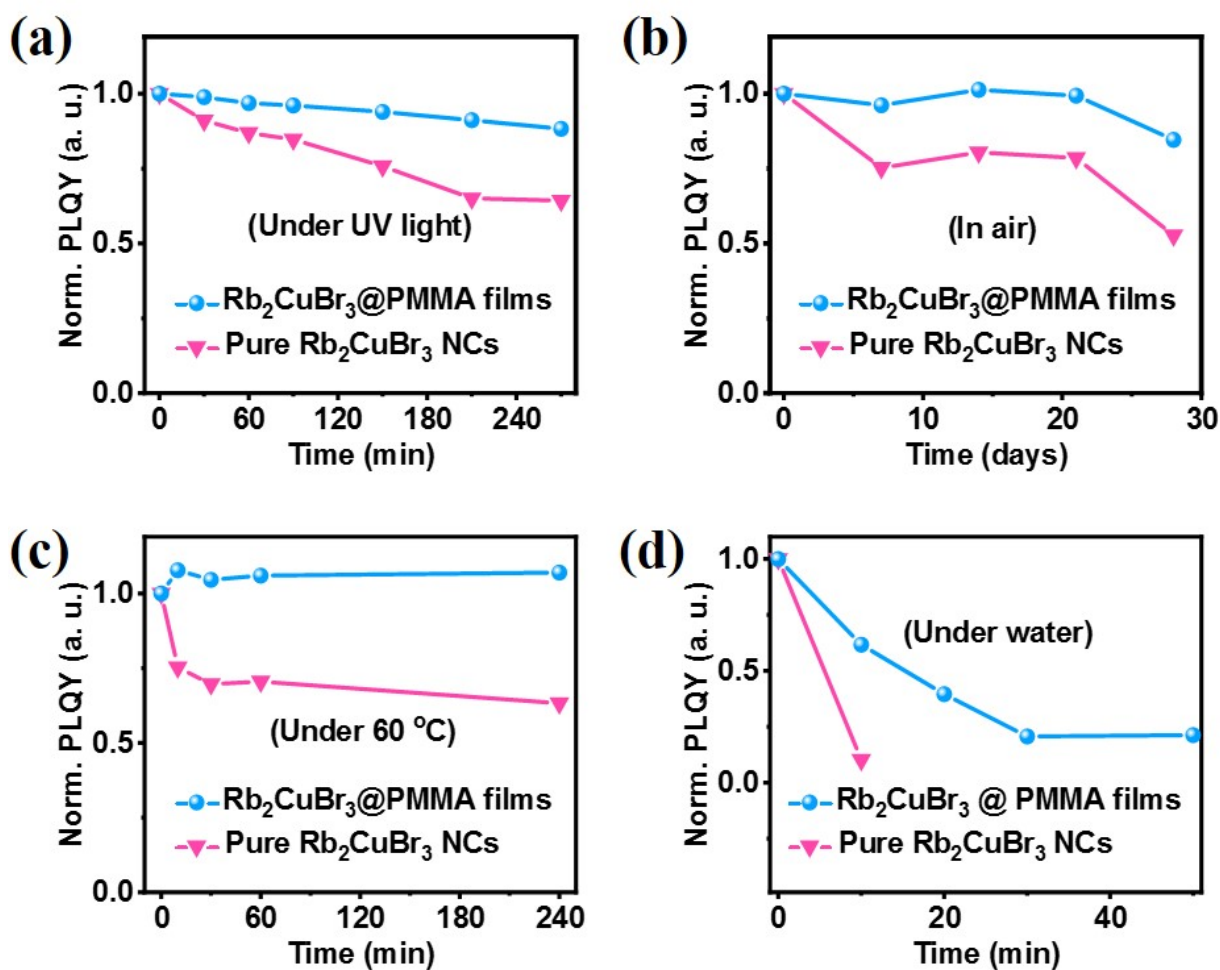

**Figure S15.** (a) and (b) The stability comparisons of the standalone  $\text{Rb}_2\text{CuBr}_3$  NCs and  $\text{Rb}_2\text{CuBr}_3@\text{PMMA}$  films under continuous UV light irradiations and ambient environment exposure, respectively. (c) Normalized PLQYs of  $\text{Rb}_2\text{CuBr}_3$  NCs and  $\text{Rb}_2\text{CuBr}_3@\text{PMMA}$  films after continuous heating ( $60\text{ }^\circ\text{C}$ ) for different time. The PLQY of  $\text{Rb}_2\text{CuBr}_3$  NCs decreases after heating, which is due to the thermal quenching effect and agglomeration effect at high temperature. The PLQY of the  $\text{Rb}_2\text{CuBr}_3@\text{PMMA}$  films showed a slight increase after heating, which may be due to the evaporation of water from the sample surface. (d) Normalized PLQYs of  $\text{Rb}_2\text{CuBr}_3$  NCs and  $\text{Rb}_2\text{CuBr}_3@\text{PMMA}$  films soaked in water for different time. The PLQY of  $\text{Rb}_2\text{CuBr}_3$  NCs decreased rapidly after soaking in water, while the PLQY of  $\text{Rb}_2\text{CuBr}_3@\text{PMMA}$  films decreased slower, indicating that the polar solvent of water damages the samples greatly, and the polymer can slow this damage. This is because PMMA not only provides a matrix, but also effectively isolates water and oxygen in air.

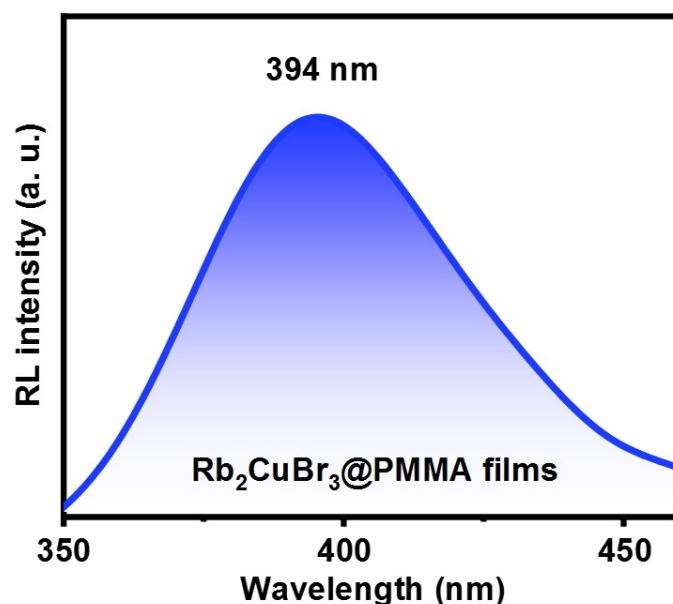

**Figure S16.** Radioluminescence (RL) spectra of  $\text{Rb}_2\text{CuBr}_3@\text{PMMA}$  films.

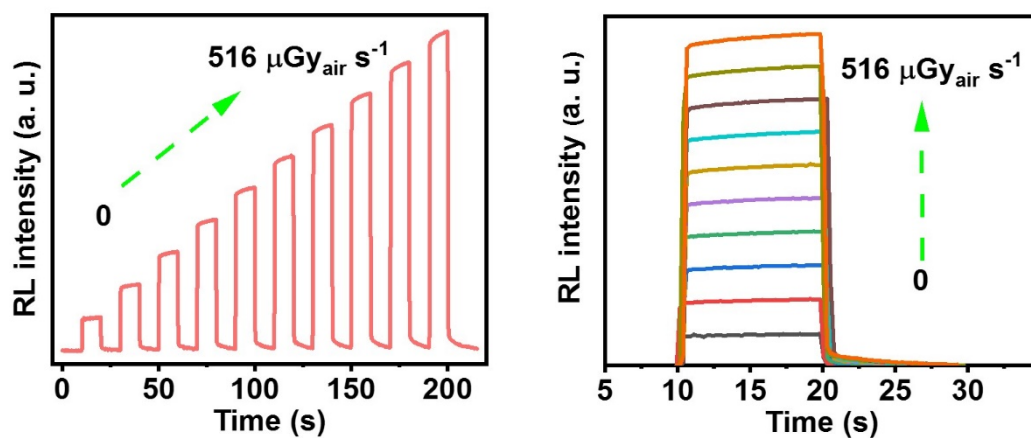

**Figure S17.** RL intensity-dose curve of  $\text{Rb}_2\text{CuBr}_3@\text{PMMA}$  films.

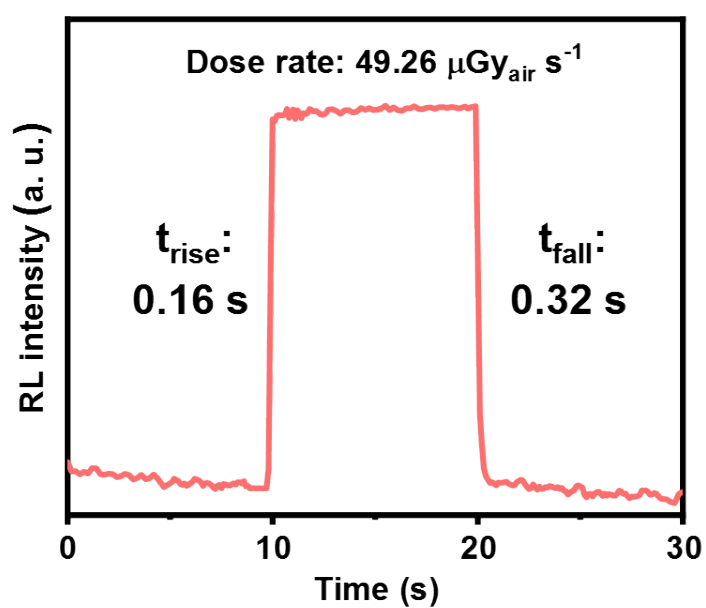

**Figure S18.** RL intensity-time curve of  $\text{Rb}_2\text{CuBr}_3@\text{PMMA}$  films.

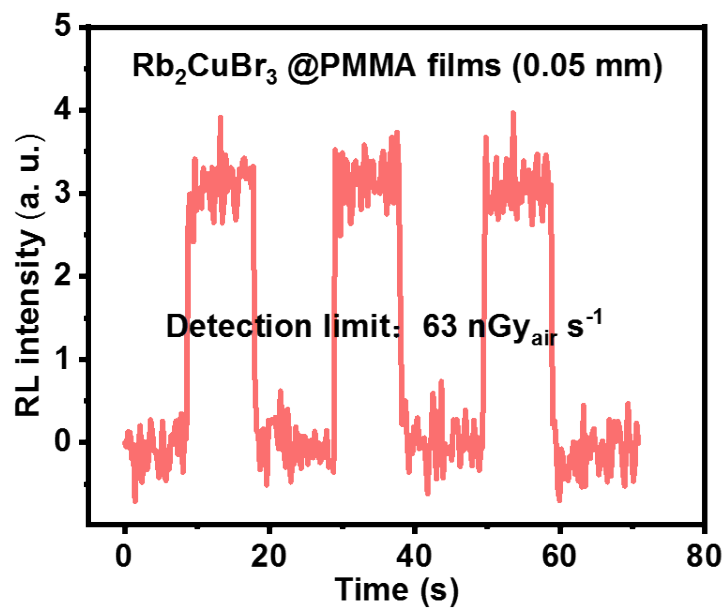

**Figure S19.** Detection limit of Rb<sub>2</sub>CuBr<sub>3</sub>@PMMA films (0.05 mm).

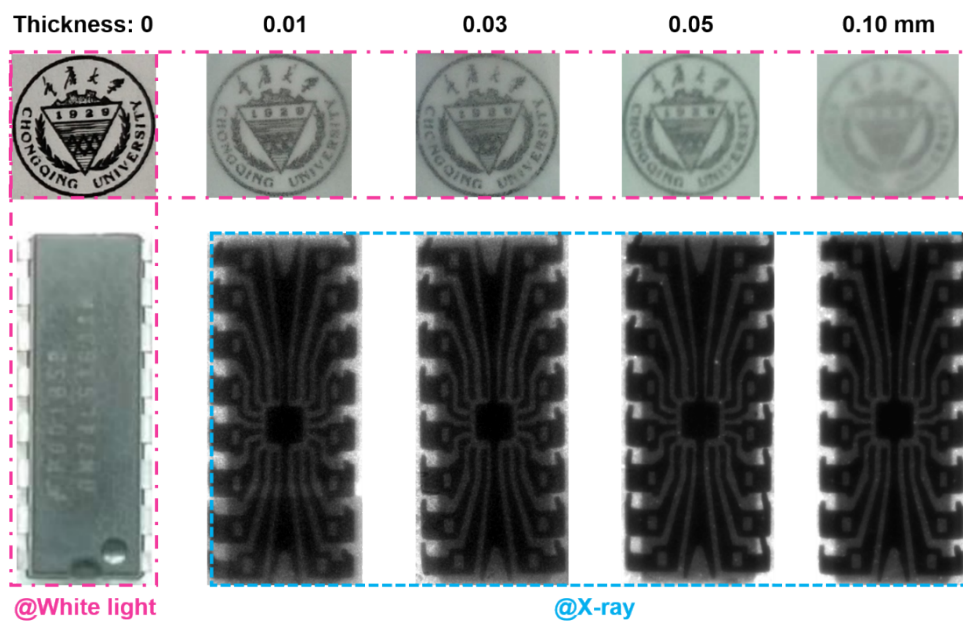

**Figure S20.** Upper panel: visible light transmission of Rb<sub>2</sub>CuBr<sub>3</sub>@PMMA films with different thickness as measured by covering the printed school badge by Rb<sub>2</sub>CuBr<sub>3</sub>@PMMA films. Lower panel: X-ray imaging of a chip under X-ray irradiation. Thicker films reduce the transmission rate of visible light, which may still be limited by the transparency of Rb<sub>2</sub>CuBr<sub>3</sub> itself.

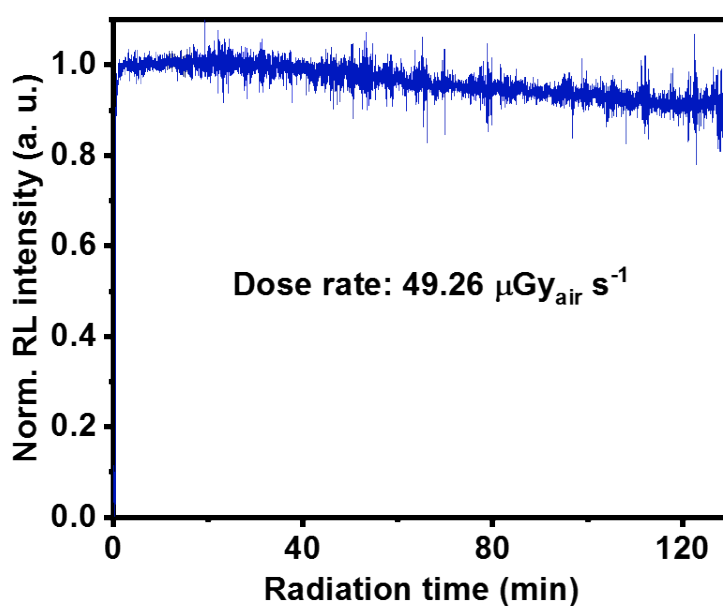

**Figure S21.** X-ray irradiation stability of  $\text{Rb}_2\text{CuBr}_3\text{@PMMA}$  films

**Table S1.** Performance comparisons of scintillators based on metal halide perovskites.

| Chemical component                                                                     | Flexible   | Detection limit<br>(nGy s <sup>-1</sup> ) | Spatial resolution<br>(lp mm <sup>-1</sup> ) | Radiation stability<br>(h) | Storage stability (h)           | References       |
|----------------------------------------------------------------------------------------|------------|-------------------------------------------|----------------------------------------------|----------------------------|---------------------------------|------------------|
| CsPbBr <sub>3</sub> NCs/MMA/<br>photoinitiator                                         | Yes        | -                                         | 9.8<br>(MTF=0.2)                             | -                          | -                               | 1                |
| CsPbBr <sub>3</sub> NCs/PDMS                                                           | Yes        | 13                                        | 5<br>(MTF=0.4)                               | 35.3                       | -                               | 2                |
| (C <sub>8</sub> H <sub>17</sub> NH <sub>3</sub> ) <sub>2</sub> SnBr <sub>4</sub> /PMMA | Yes        | -                                         | 2.5 (0.2 mm)                                 | 0.22                       | -                               | 3                |
| (C <sub>38</sub> H <sub>34</sub> P <sub>2</sub> )MnBr <sub>4</sub><br>powder/PDMS      | Yes        | 461.1                                     | 1.5 (0.322<br>mm)                            | 4                          | -                               | 4                |
| Cs <sub>3</sub> Cu <sub>2</sub> I <sub>5</sub> :Tl single crystals                     | No         | 66.3                                      | -                                            | -                          | -                               | 5                |
| Cs <sub>3</sub> Cu <sub>2</sub> I <sub>5</sub> powders/PDMS                            | Yes        | -                                         | 6.8<br>(MTF=0.2)                             | 1                          | ~1440<br>(unchange in<br>air)   | 6                |
| Cs <sub>3</sub> Cu <sub>2</sub> Cl <sub>5</sub> : 2%<br>K <sup>+</sup> /polystyrene    | Yes        | 63.5                                      | 5                                            | -                          | -                               | 7                |
| Rb <sub>2</sub> CuCl <sub>3</sub> crystals                                             | No         | 88.5                                      | -                                            | 48 (>90%)                  | ~1200 (>90%<br>in air)          | 8                |
| Rb <sub>2</sub> CuBr <sub>3</sub> single crystal                                       | No         | 121.5                                     | -                                            | -                          | 1440 (in air)                   | 9                |
| Rb <sub>2</sub> CuBr <sub>3</sub> /polystyrene                                         | Yes        | -                                         | 1.7 (0.29 mm)                                | -                          | 1008 (in air)                   | 10               |
| <b>Rb<sub>2</sub>CuBr<sub>3</sub> NCs/PMMA</b>                                         | <b>Yes</b> | <b>63</b>                                 | <b>11.3</b><br>(MTF=0.2)                     | <b>2.2</b>                 | <b>672 (&gt;84%<br/>in air)</b> | <b>This work</b> |

## References

1. J. H. Heo, D. H. Shin, J. K. Park, D. H. Kim, S. J. Lee and S. H. Im, *Adv. Mater.*, 2018, **30**, 1801743.
2. Q. S. Chen, J. Wu, X. Y. Ou, B. L. Huang, J. Almutlaq, A. A. Zhumeckenov, X. W. Guan, S. Y. Han, L. L. Liang, Z. G. Yi, J. Li, X. J. Xie, Y. Wang, Y. Li, D. Y. Fan, D. B. L. Teh, A. H. All, O. F. Mohammed, O. M. Bakr, T. Wu, M. Bettinelli, H. H. Yang, W. Huang and X. G. Liu, *Nature*, 2018, **561**, 88-93.
3. J. Cao, Z. Guo, S. Zhu, Y. Fu, H. Zhang, Q. Wang and Z. Gu, *ACS Appl. Mater. Interfaces*, 2020, **12**, 19797-19804.
4. L. J. Xu, X. S. Lin, Q. Q. He, M. Worku and B. W. Ma, *Nat. Commun.*, 2020, **11**, 4329.
5. S. L. Cheng, M. Nikl, A. Beitlerova, R. Kucerkova, X. Y. Du, G. D. Niu, Y. C. Jia, J. Tang, G. H. Ren and Y. T. Wu, *Adv. Opt. Mater.*, 2021, **9**, 2100460.
6. Y. C. Liu, Y. X. Zhang, Z. Yang, J. Cui, H. D. Wu, X. D. Ren, K. Zhao, J. S. Feng, J. Tang, Z. Xu and S. Z. Liu, *Adv. Opt. Mater.*, 2020, **8**, 2000814.
7. L. L. Han, B. B. Sun, C. Guo, G. Q. Peng, H. Y. Chen, Z. Yang, N. Li, Z. P. Ci and Z. W. Jin, *Adv. Opt. Mater.*, 2022, **10**, 2102453.
8. X. Zhao, G. D. Niu, J. S. Zhu, B. Yang, J. H. Yuan, S. R. Li, W. R. Gao, Q. S. Hu, L. X. Yin, K. H. Xue, E. Lifshitz, X. S. Miao and J. Tang, *J. Phys. Chem. Lett.*, 2020, **11**, 1873-1880.
9. B. Yang, L. Yin, G. Niu, J. H. Yuan, K. H. Xue, Z. Tan, X. S. Miao, M. Niu, X. Du, H. Song, E. Lifshitz and J. Tang, *Adv Mater*, 2019, **31**, e1904711.
10. L. L. Han, H. Zhang, Y. Y. Ning, H. Y. Chen, C. Guo, J. H. Cui, G. Q. Peng, Z. P. Ci and Z. W. Jin, *Chem. Eng. J.*, 2022, **430**, 132826.
